# Supplementary material for: Intra-Specific Venom Variation in the Australian Coastal Taipan Oxyuranus scutellatus
Source: MDPI journal article supplement (doi:10.3390/toxins12080485), 2020-07-30
Supplement: s1 [file s1]

# Supplementary Materials: Intra-Specific Venom Variation in the Australian Coastal Taipan *Oxyuranus scutellatus*

Theo Tasoulis, Anjana Silva, Punnam Chander Veerati, Mark Baker, Wayne C. Hodgson, Nathan Dunstan and Geoffrey K. Isbister

Electrophoresis/MS

| B                | C                                        | D                                              | E        | F             | G         | H             | I    | J |
|------------------|------------------------------------------|------------------------------------------------|----------|---------------|-----------|---------------|------|---|
| Best N (Pe All N | Accessions                               | Names                                          | Start Pe | Best Conf (Pe | Best Hypo | Sequence      |      |   |
| 1                | 1 sp P0CB06 3512_OXYSC; sp Q45Z11 3511_O | Short neurotoxin 2 OS=Oxyuranus scutellatus    | 1        | 97            | 96.97     | MTCYNQSSSEAK  | Met  |   |
| 1                | 1 sp P0CB06 3512_OXYSC; sp Q45Z11 3511_O | Short neurotoxin 2 OS=Oxyuranus scutellatus    | 1        | 32.3          | 32.32     | MTCYNQSSSEAK  | Oxi  |   |
| 1                | 1 sp P0CB06 3512_OXYSC; sp Q45Z11 3511_O | Short neurotoxin 2 OS=Oxyuranus scutellatus    | 1        | 32.3          | 32.02     | MTCYNQSSSEAK  | Oxi  |   |
| 1                | 1 sp P0CB06 3512_OXYSC; sp Q45Z11 3511_O | Short neurotoxin 2 OS=Oxyuranus scutellatus    | 1        | 32.3          | 28.05     | MTCYNQSSSEAK  | Carl |   |
| 1                | 1 sp P0CB06 3512_OXYSC; sp Q45Z11 3511_O | Short neurotoxin 2 OS=Oxyuranus scutellatus    | 1        | 32.3          | 16.09     | MTCYNQSSSEAK  | Carl |   |
| 1                | 1 sp P0CB06 3512_OXYSC; sp Q45Z11 3511_O | Short neurotoxin 2 OS=Oxyuranus scutellatus    | 1        | 32.3          | 15.94     | MTCYNQSSSEAK  | Carl |   |
| 1                | 1 sp P0CB06 3512_OXYSC; sp Q45Z11 3511_O | Short neurotoxin 2 OS=Oxyuranus scutellatus    | 1        | 99            | 90.45     | MTCYNQSSSEAK  | Carl |   |
| 1                | 1 sp P0CB06 3512_OXYSC; sp Q45Z11 3511_O | Short neurotoxin 2 OS=Oxyuranus scutellatus    | 1        | 99            | 2.234     | MTCYNQSSSEAK  | Carl |   |
| 1                | 1 sp P0CB06 3512_OXYSC; sp Q45Z11 3511_O | Short neurotoxin 2 OS=Oxyuranus scutellatus    | 1        | 92.5          | 92.45     | MTCYNQSSSEAK  | Carl |   |
| 1                | 1 sp P0CB06 3512_OXYSC; sp Q45Z11 3511_O | Short neurotoxin 2 OS=Oxyuranus scutellatus    | 1        | 80.3          | 80.31     | MTCYNQSSSEAK  | Met  |   |
| 1                | 1 sp P0CB06 3512_OXYSC; sp Q45Z11 3511_O | Short neurotoxin 2 OS=Oxyuranus scutellatus    | 1        | 80.3          | 71.95     | MTCYNQSSSEAK  | Thr  |   |
| 1                | 1 sp P0CB06 3512_OXYSC; sp Q45Z11 3511_O | Short neurotoxin 2 OS=Oxyuranus scutellatus    | 3        | 99            | 99        | CYNQSSSEAK    | Cys  |   |
| 1                | 1 sp P0CB06 3512_OXYSC; sp Q45Z11 3511_O | Short neurotoxin 2 OS=Oxyuranus scutellatus    | 3        | 99            | 86.5      | CYNQSSSEAK    | Cys  |   |
| 2                | 2 sp B7S4N9 VKT_OXYSC                    | Kunitz-type serine protease inhibitor taicotox | 47       | 95.3          | 95.3      | FYYNPHSK      |      |   |
| 3                | 3 sp Q3SAX8 VNPD_OXYSC                   | Natriuretic peptide OsNP-d (Fragment) OS=O:    | 22       | 38.3          | 38.32     | IGSVSGLGCLR   | Carl |   |
| 3                | 3 sp Q3SAX8 VNPD_OXYSC                   | Natriuretic peptide OsNP-d (Fragment) OS=O:    | 22       | 47.3          | 47.29     | IGSVSGLGCLR   | Carl |   |
| 3                | 3 sp Q3SAX8 VNPD_OXYSC                   | Natriuretic peptide OsNP-d (Fragment) OS=O:    | 33       | 55.4          | 55.42     | LVQNPPKPIGSES | Asn  |   |
| 3                | 3 sp Q3SAX8 VNPD_OXYSC                   | Natriuretic peptide OsNP-d (Fragment) OS=O:    | 33       | 93.7          | 93.66     | LVQNPPKPIGSES |      |   |
| 3                | 3 sp Q3SAX8 VNPD_OXYSC                   | Natriuretic peptide OsNP-d (Fragment) OS=O:    | 33       | 93.7          | 55.09     | LVQNPPKPIGSE  | Oxi  |   |
| 3                | 3 sp Q3SAX8 VNPD_OXYSC                   | Natriuretic peptide OsNP-d (Fragment) OS=O:    | 33       | 93.7          | 41.77     | LVQNPPKPIGSES | Oxi  |   |
|                  |                                          |                                                |          | 99            | 99        | AEESGPAAGR    |      |   |
|                  |                                          |                                                |          | 37.4          | 37.41     | NWNINTK       |      |   |

**Figure S1.** Mass spectrometry results of the trypsin digest of the 10kDa peak showing the presence of kunitz peptides and natriuretic peptides in addition to short-chain neurotoxins.

## Mass Spectrometry

Mass spectrometry (SCIEX 6600 TripleTof) of this band gave a 78% sequence coverage at 95% confidence as being a 3FTx neurotoxin previously recorded in *O. scutellatus* venom.

Fraction 38 min from the RP-HPLC was injected directly into the Q-Exactive Orbitrap. The mass spectra and intact mass spec were recorded for at least 5 min. The spectra were then averaged, and the monoisotopic peak was found to be 1345.2 Da ( $z = 5$ ) (Figure S2). The protein is 6.7 kDa.

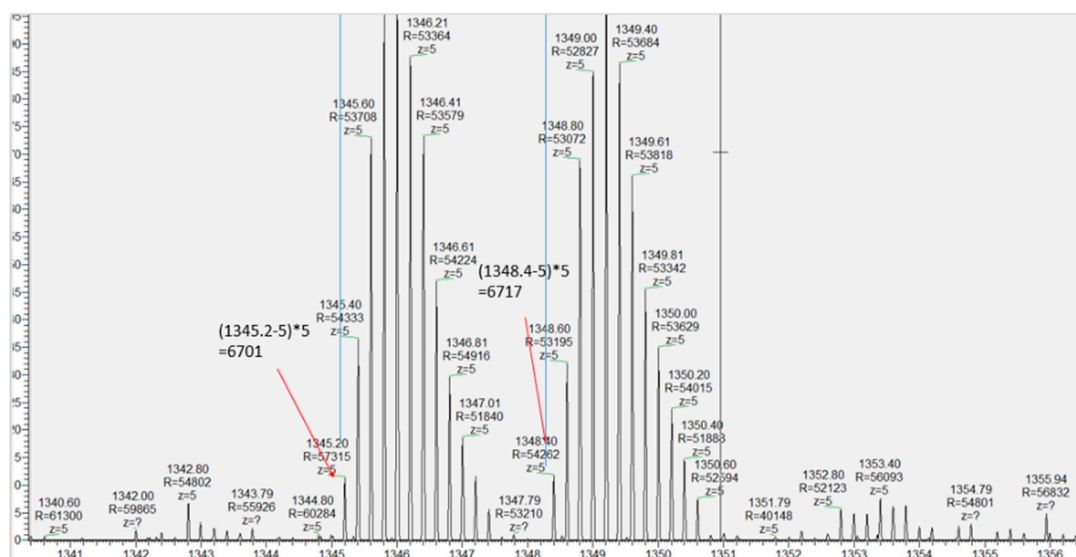

**Figure S2.** Intact mass spectra of 38 min peak on Q-Exactive Orbitrap showing the mass of the monoisotopic peak to be 6.7 kDa, corresponding to the mass from 3FTxs previously recorded from *O. scutellatus*.

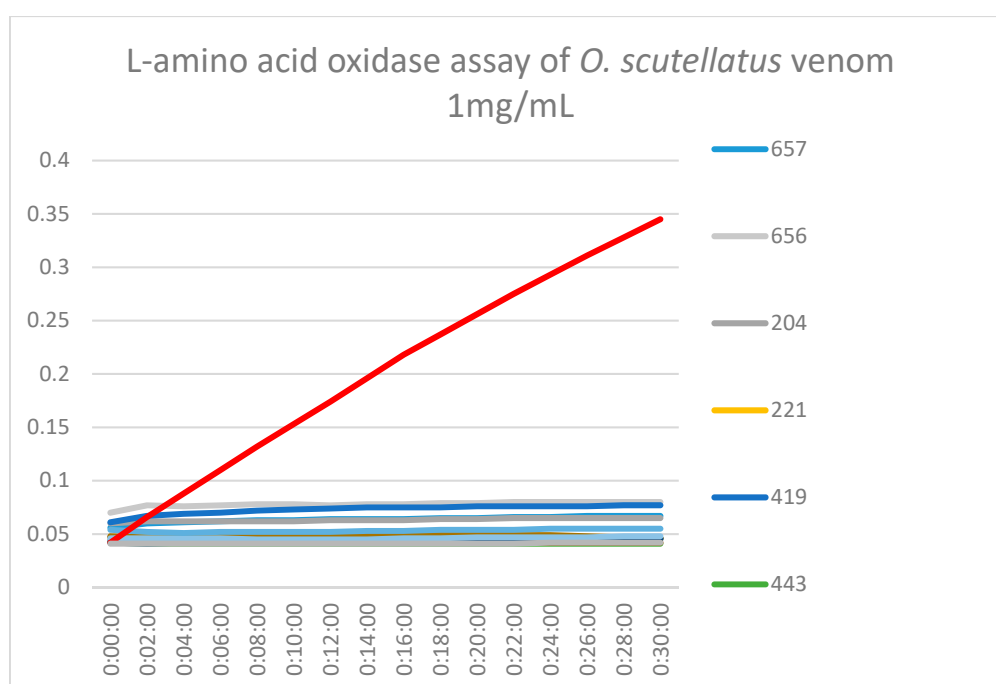

**Figure S3.** LAAO assay of all 13 taipans with venom of the elapid *Suta suta* as a positive control (red).
